# Supplementary material for: Achieving large thermal hysteresis in an anthracene-based manganese(II) complex via photo-induced electron transfer
Source: PubMed Central journal article supplement (PMC9098415; doi:10.1038/s41467-022-30425-1), 2022-05-12
Supplement: 41467_2022_30425_MOESM1_ESM.pdf [file 41467_2022_30425_MOESM1_ESM.pdf]

## **Supplementary Information for**

# **Achieving Large Thermal Hysteresis of an Anthracene-Based Manganese(II) Complex via Photo-Induced Electron Transfer**

Ji-Xiang Hu<sup>1</sup>, Qi Li<sup>1</sup>, Hai-Lang Zhu<sup>2</sup>, Zhen-Ni Gao<sup>1</sup>, Qian Zhang<sup>1</sup>, Tao Liu<sup>2\*</sup> and Guo-Ming Wang<sup>1\*</sup>

<sup>1</sup>College of Chemistry and Chemical Engineering, Qingdao University, Shandong, 266071, P. R. China;

<sup>2</sup>State Key Laboratory of Fine Chemicals, Dalian University of Technology, Dalian, 116024, P. R. China.

\*Corresponding Authors: Guo-Ming Wang: gmwang\_pub@163.com; Tao Liu: liutao@dlut.edu.cn.

## Supplementary Figures

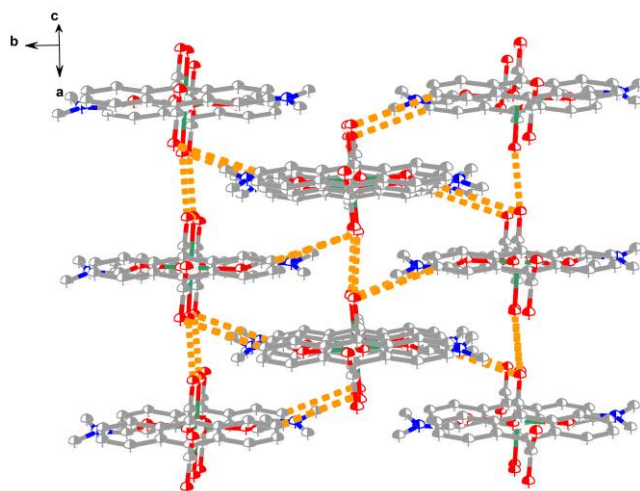

**Supplementary Figure 1.** The supramolecular structure via H-bond interactions for compound **1** with thermal ellipsoids set at 50% probability.

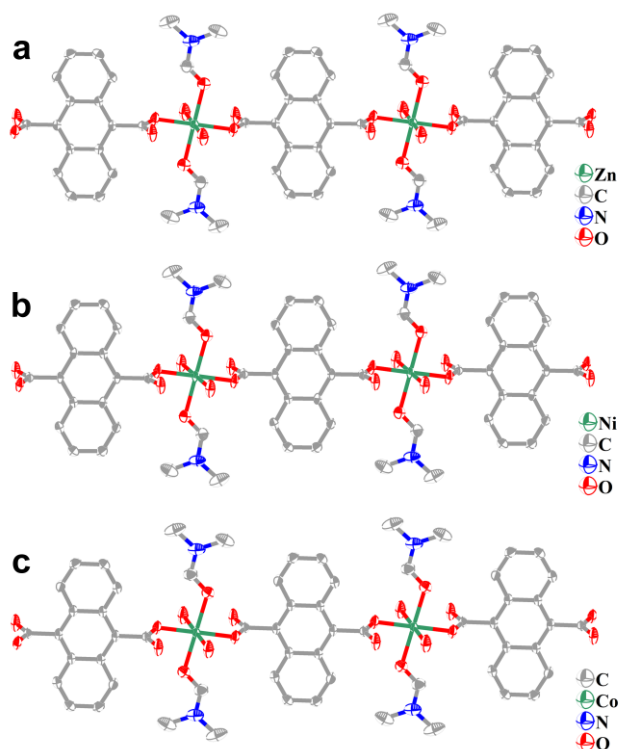

**Supplementary Figure 2.** The 1D structure for compounds **2** (a), **3** (b) and **4** (c) with thermal ellipsoids set at 50% probability. The green, grey-40%, red and blue colors represented M<sup>2+</sup> (M = Zn, Ni and Co for **2**, **3** and **4**, respectively), C, O and N atoms, respectively. Hydrogen atoms are omitted for clarity.

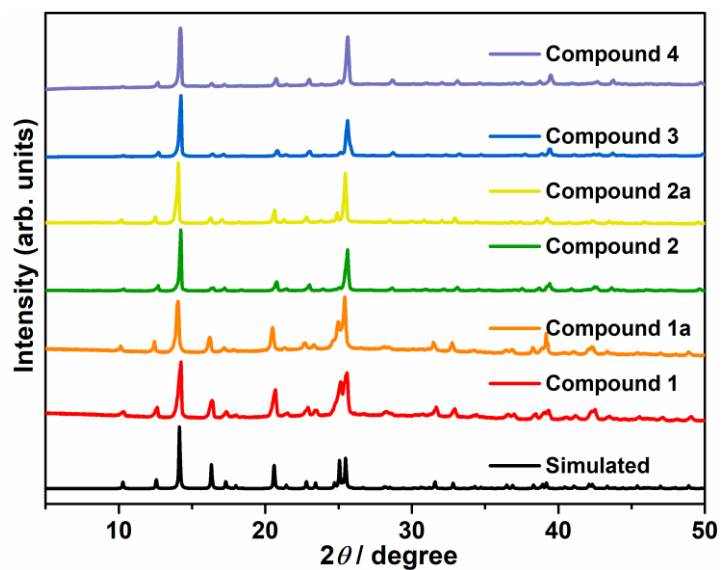

Supplementary Figure 3. PXRD plots for compounds 1–4 at 293 K.

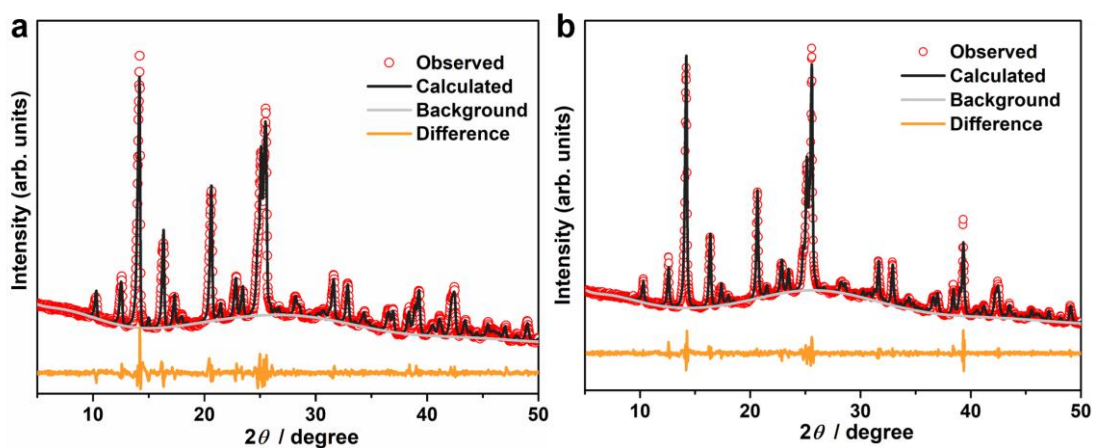

Supplementary Figure 4. Le Bail method fit to PXRD data for compounds 1 (a) and 1a (b).

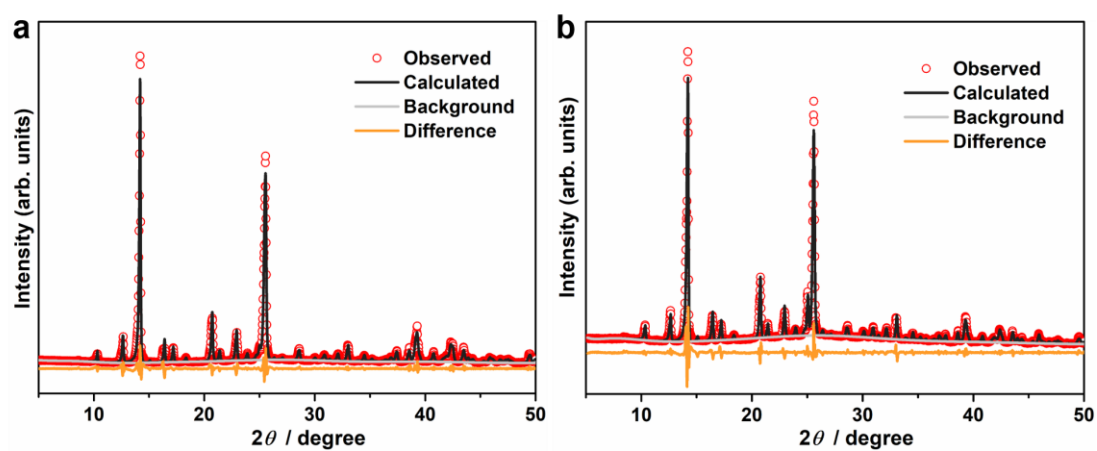

Supplementary Figure 5. Le Bail method fit to PXRD data for compounds 2 (a) and 2a (b).

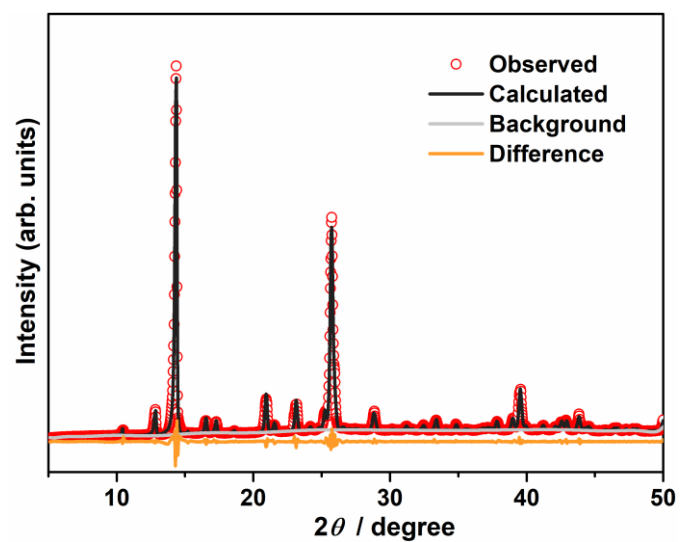

**Supplementary Figure 6.** Le Bail method fit to PXR D data for compound 3.

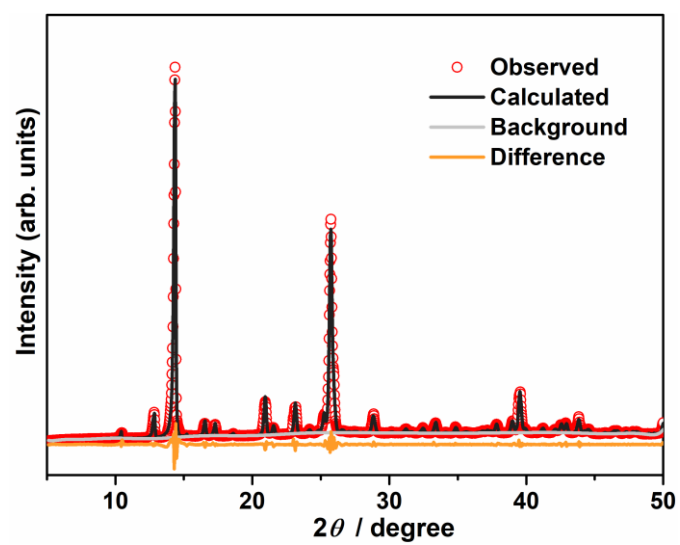

**Supplementary Figure 7.** Le Bail method fit to PXR D data for compound 4.

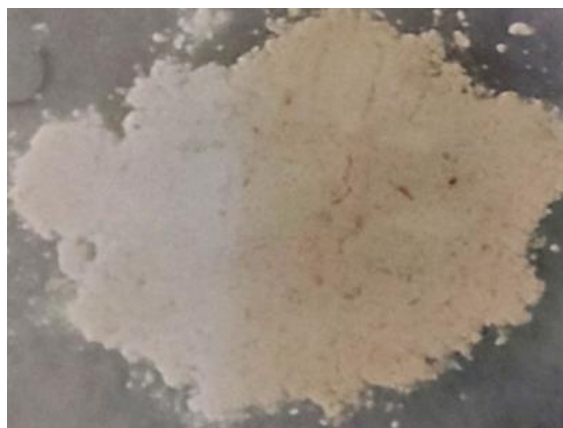

**Supplementary Figure 8.** The color changes of powder sample 1 after Xe lamp light irradiation.

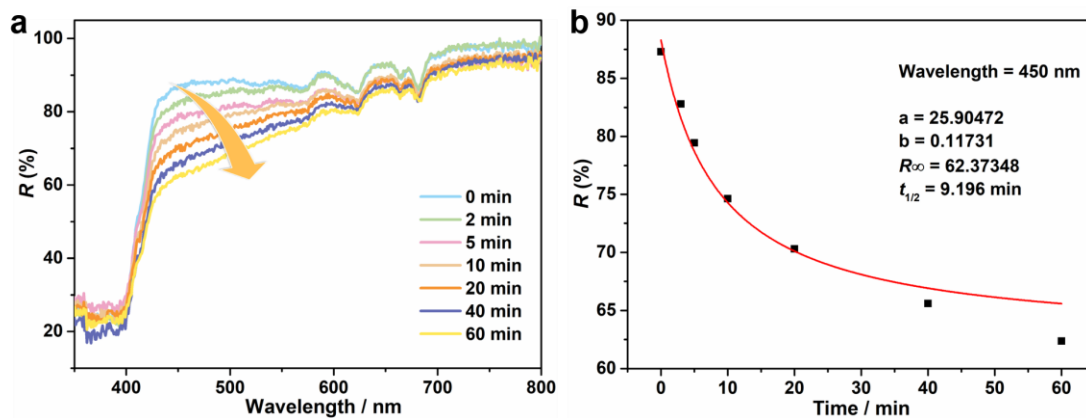

**Supplementary Figure 9.** (a) Time-dependent UV-Vis diffuse-reflectance spectra of **1** upon irradiation, which were obtained by transforming the absorption spectra; (b) The plot of relative intensity of time-dependent UV-Vis spectra at 450 nm upon light irradiation. The red solid line presented the fitted curve. The kinetics of the coloration for **1** was analyzed in order to estimate the rate of photochromism, using function  $R^{\lambda_{\text{max}}}(t) = a/(bt + 1) + R^{\lambda_{\text{max}}}(\infty)$  to fit peak of diffuse reflection versus time curve. The relative parameters are listed in Supplementary Figure 9b, wherein, the constant  $a$  and  $b$  are proportionality constant,  $R^{\lambda_{\text{max}}}(\infty)$  is the peak value of diffuse reflection spectrum after complete irradiation. Furthermore, substituting  $R(t) = [R(0) + R(\infty)]/2$  into the function gives the value of half-time  $t_{1/2}$  about 9.20 min.

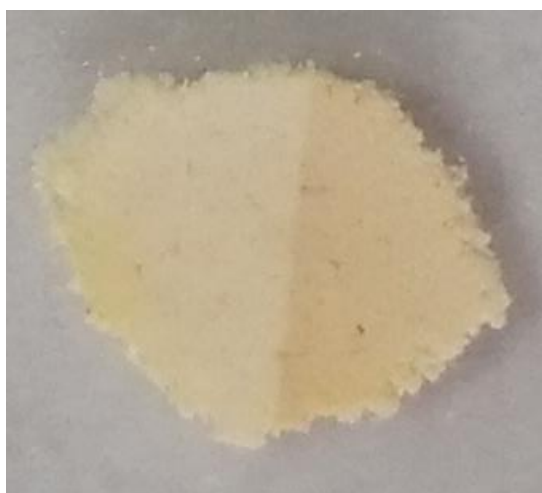

**Supplementary Figure 10.** The color changes of powder sample **2** after Xe lamp light irradiation.

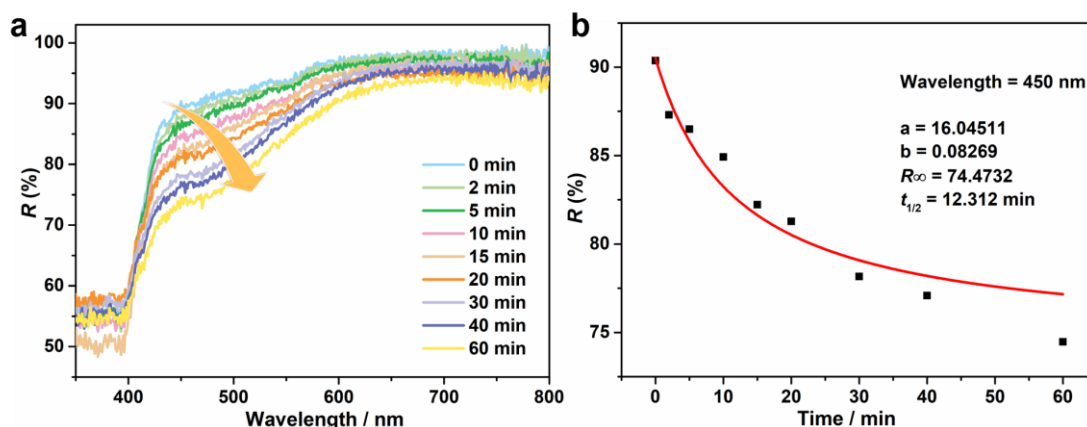

**Supplementary Figure 11.** (a) Time-dependent UV-Vis diffuse-reflectance spectra of **2** upon irradiation, which were obtained by transforming the absorption spectra; (b) The plot of relative intensity of time-dependent UV-Vis spectra at 450 nm upon light irradiation. The red solid line presented the fitted curve. The kinetics of the coloration for **2** was analyzed in order to estimate the rate of photochromism, using function  $R^{\lambda_{\text{max}}}(t) = a/(bt + 1) + R^{\lambda_{\text{max}}}(\infty)$  to fit peak of diffuse reflection versus time curve. The relative parameters are listed in supplementary Figure 11b, wherein, the constant  $a$  and  $b$  are proportionality constant,  $R^{\lambda_{\text{max}}}(\infty)$  is the peak value of diffuse reflection spectrum after complete irradiation. Furthermore, substituting  $R(t) = [R(0) + R(\infty)]/2$  into the function gives the value of half-time  $t_{1/2}$  about 12.31 min.

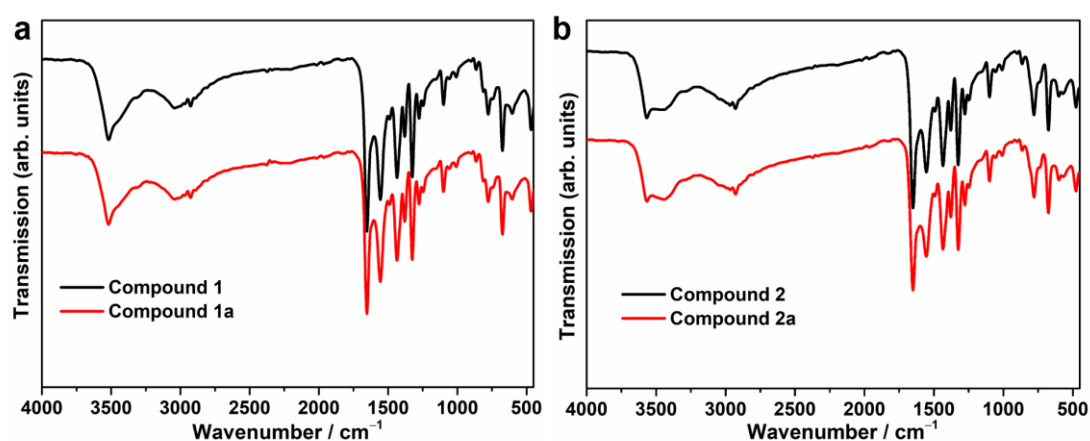

**Supplementary Figure 12.** IR plots for compounds **1** (a) and **2** (b).

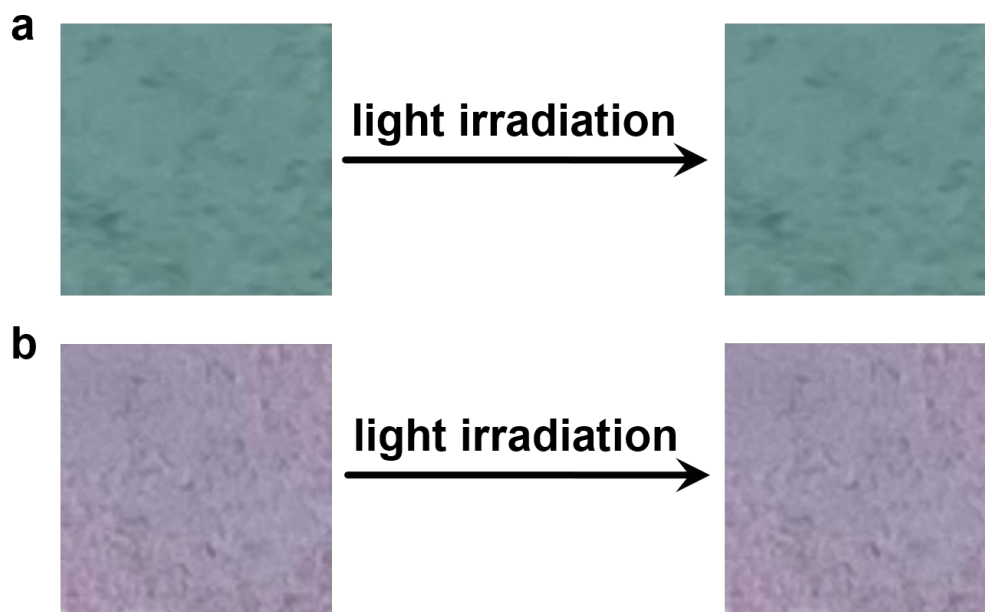

**Supplementary Figure 13.** The color of compounds **3** (a) and **4** (b) before and after Xe lamp light irradiation. As seen in the pictures, no observable photochromic phenomenon occurred in these two compounds.

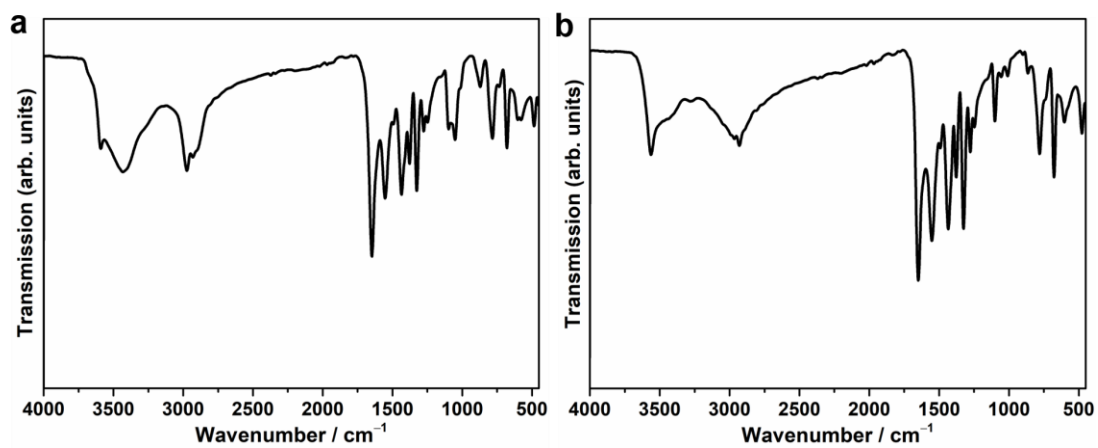

**Supplementary Figure 14.** IR plots for compounds **3** (a) and **4** (b) at 293 K.

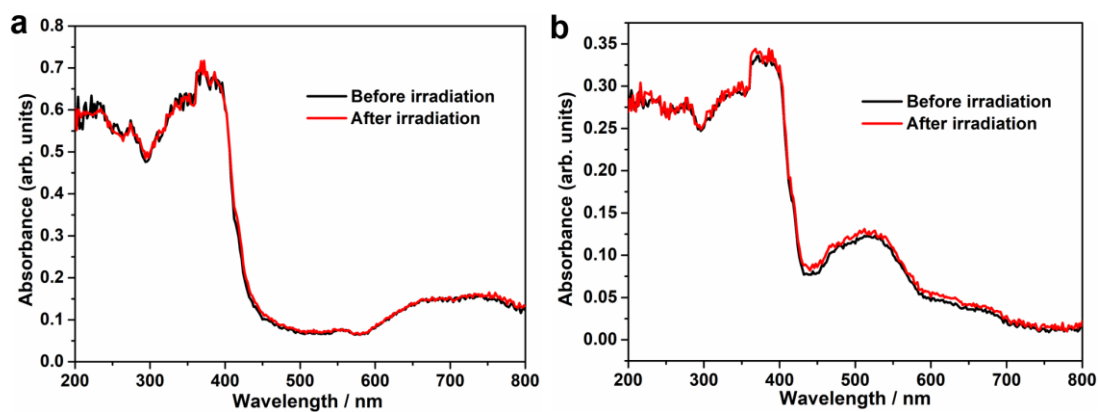

**Supplementary Figure 15.** Solid state UV-Vis spectra of compounds **3** (a) and **4** (b) before and after light irradiation. As seen in the spectra, no observable photochromic phenomenon occurred in these two compounds.

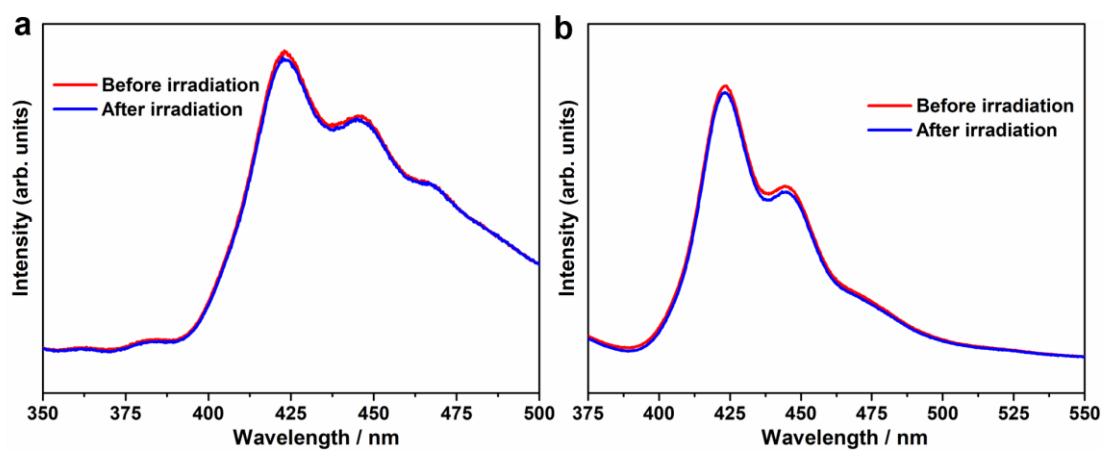

**Supplementary Figure 16.** Photoluminescent spectra of compounds **3** (a) and **4** (b) before and after light irradiation. As seen in the spectra, no observable photochromic phenomenon occurred in these two compounds.



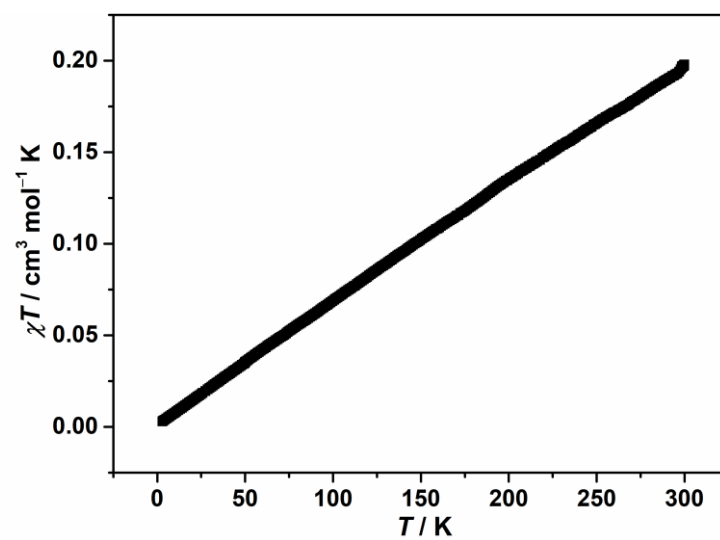

**Supplementary Figure 17.** Temperature-dependent susceptibilities of **2a** under a direct-current magnetic field of 1000 Oe.

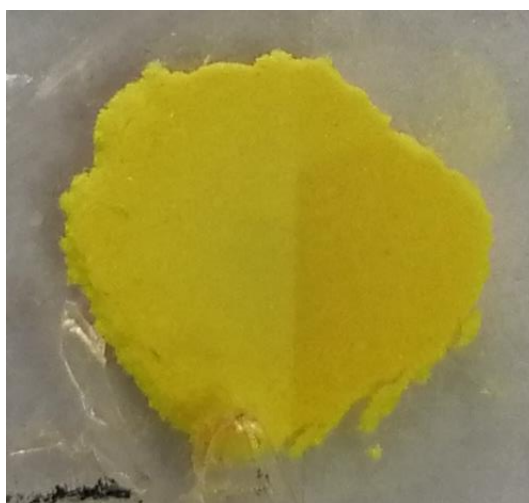

**Supplementary Figure 18.** The color changes of H<sub>2</sub>ADC after Xe lamp light irradiation.

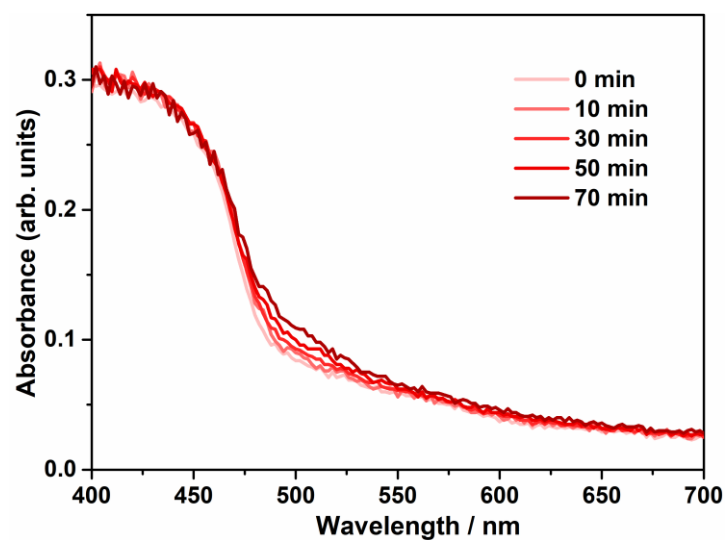

**Supplementary Figure 19.** Time-dependent UV-Vis spectra of H<sub>2</sub>ADC at solid state upon light irradiation.

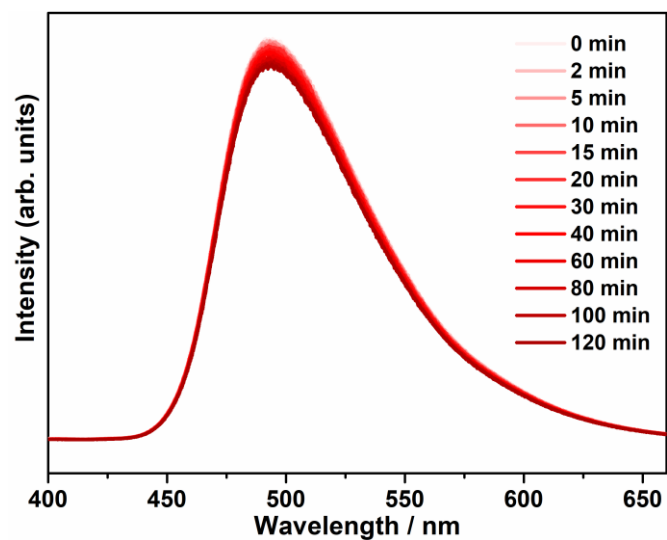

**Supplementary Figure 20.** Time-dependent photoluminescent spectra of H<sub>2</sub>ADC excited at 280 nm.

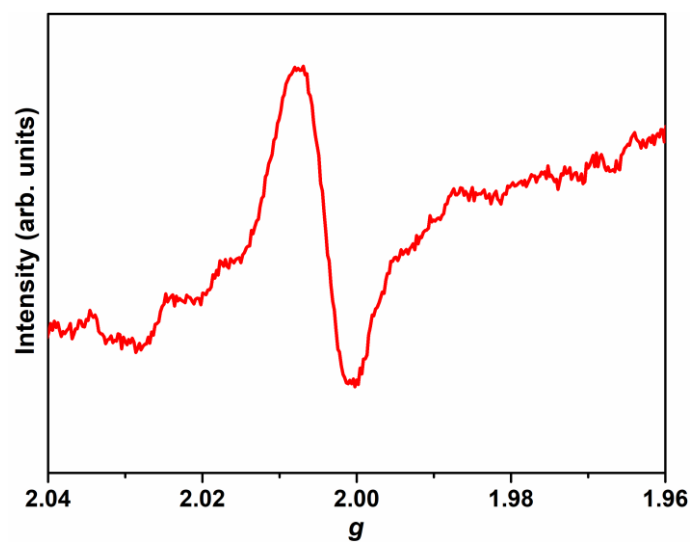

**Supplementary Figure 21.** ESR spectra of H<sub>2</sub>ADC after Xe-lamp light illumination under a frequency of 9.84 GHz.

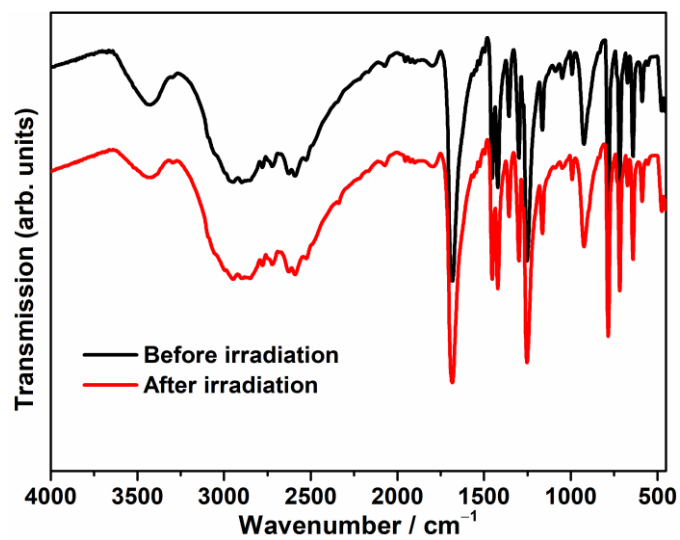

**Supplementary Figure 22.** IR plots for H<sub>2</sub>ADC at 293 K.

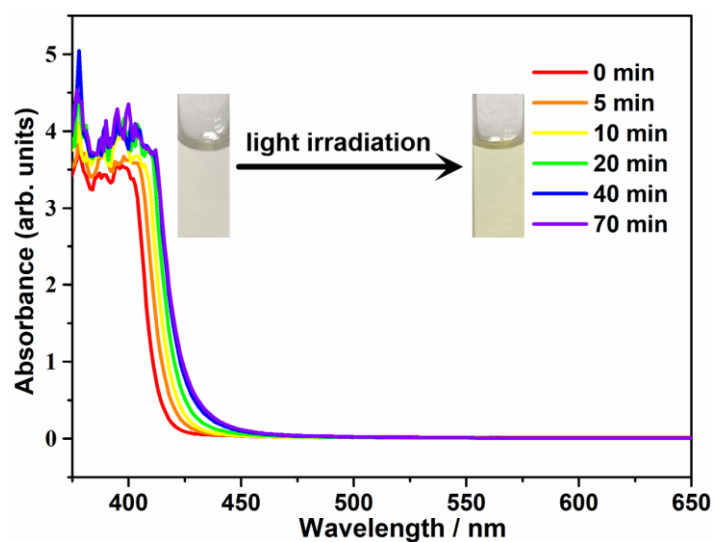

**Supplementary Figure 23.** Time-dependent UV-Vis spectra of H<sub>2</sub>ADC at DMF solvent upon light irradiation.

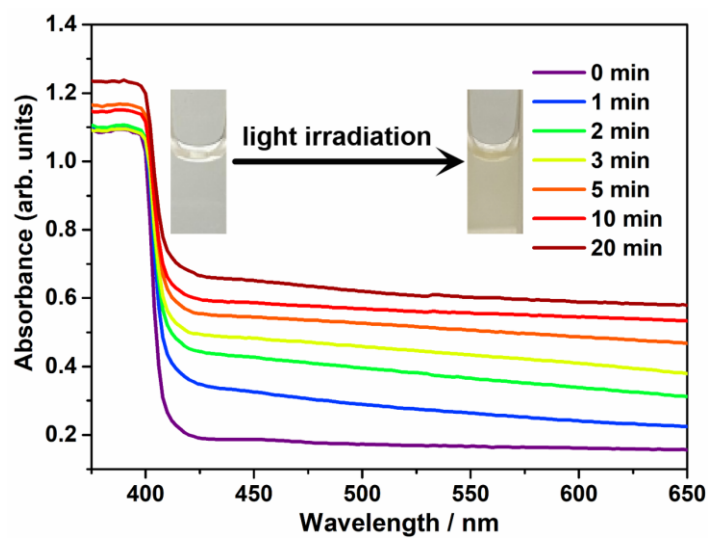

**Supplementary Figure 24.** Time-dependent UV-Vis spectra of **1** at aqueous solution upon light irradiation.

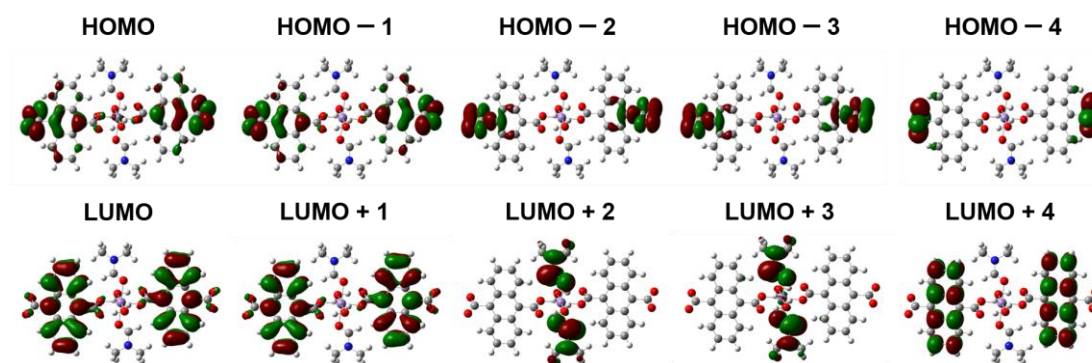

**Supplementary Figure 25.** HOMO, HOMO-1, HOMO-2, HOMO-3, HOMO-4, LUMO, LUMO+1, LUMO+2, LUMO+3 and LUMO+4 frontier molecular orbitals of compound **1** obtained by DFT calculations.

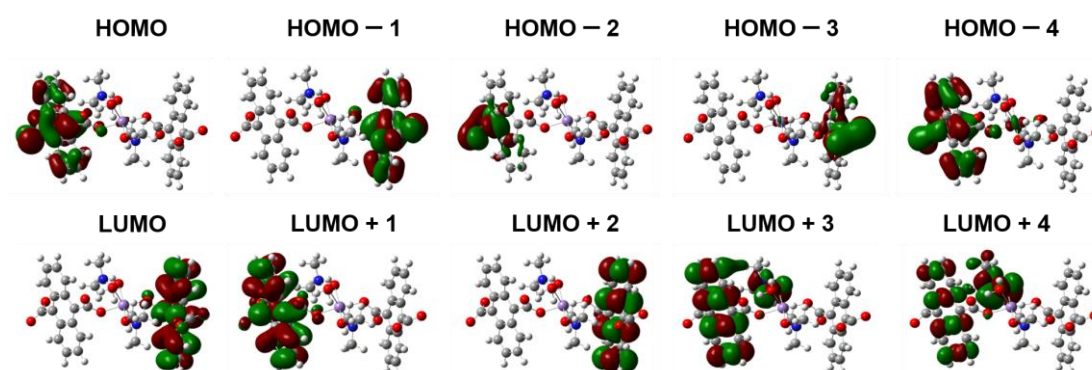

**Supplementary Figure 26.** HOMO, HOMO-1, HOMO-2, HOMO-3, HOMO-4, LUMO, LUMO+1, LUMO+2, LUMO+3 and LUMO+4 frontier molecular orbitals of compound **1a** obtained by DFT calculations.

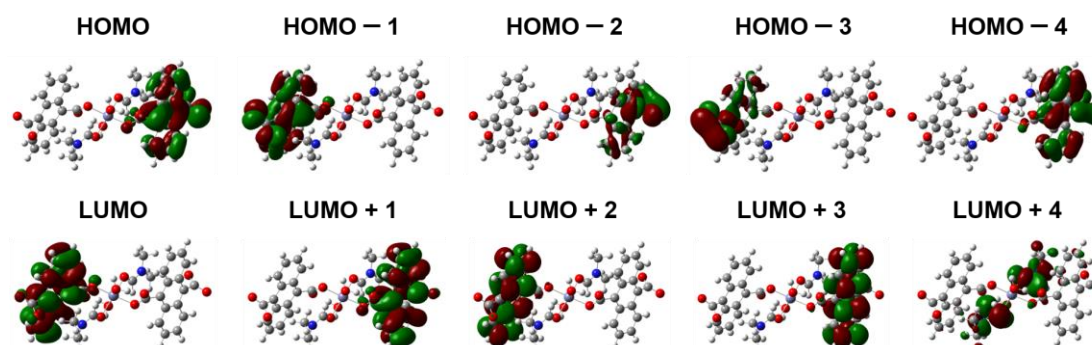

**Supplementary Figure 27.** HOMO, HOMO-1, HOMO-2, HOMO-3, HOMO-4, LUMO, LUMO+1, LUMO+2, LUMO+3 and LUMO+4 frontier molecular orbitals of compound **2** obtained by DFT calculations.

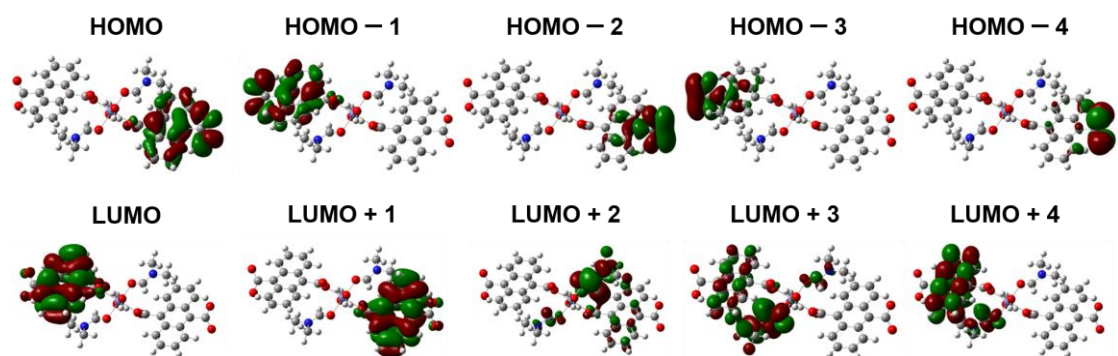

**Supplementary Figure 28.** HOMO, HOMO-1, HOMO-2, HOMO-3, HOMO-4, LUMO, LUMO+1, LUMO+2, LUMO+3 and LUMO+4 frontier molecular orbitals of compound **3** obtained by DFT calculations.

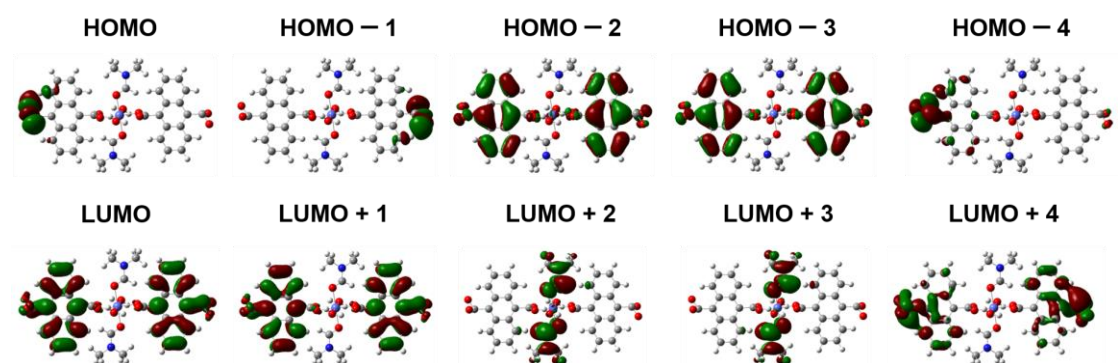

**Supplementary Figure 29.** HOMO, HOMO-1, HOMO-2, HOMO-3, HOMO-4, LUMO, LUMO+1, LUMO+2, LUMO+3 and LUMO+4 frontier molecular orbitals of compound **4** obtained by DFT calculations.

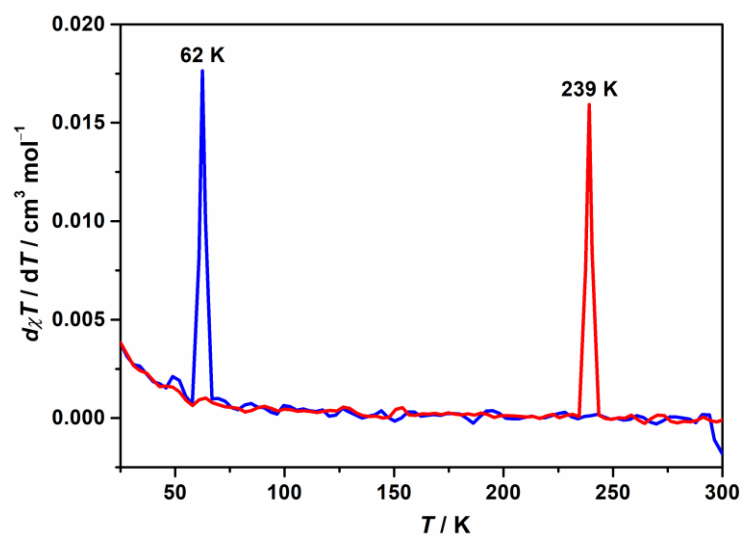

**Supplementary Figure 30.** The first order derivatives of magnetic susceptibility for **1a** in the cooling (blue) and heating (red) mode.

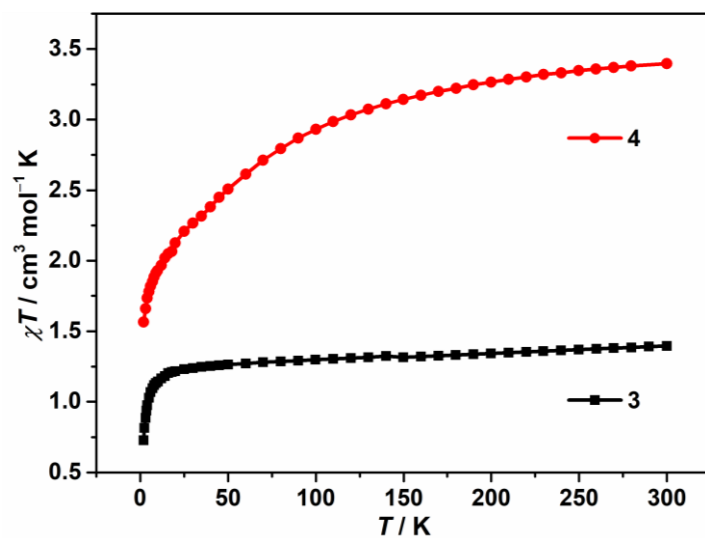

**Supplementary Figure 31.** Temperature-dependent susceptibilities of compounds **3** and **4** under a direct-current magnetic field of 1000 Oe.

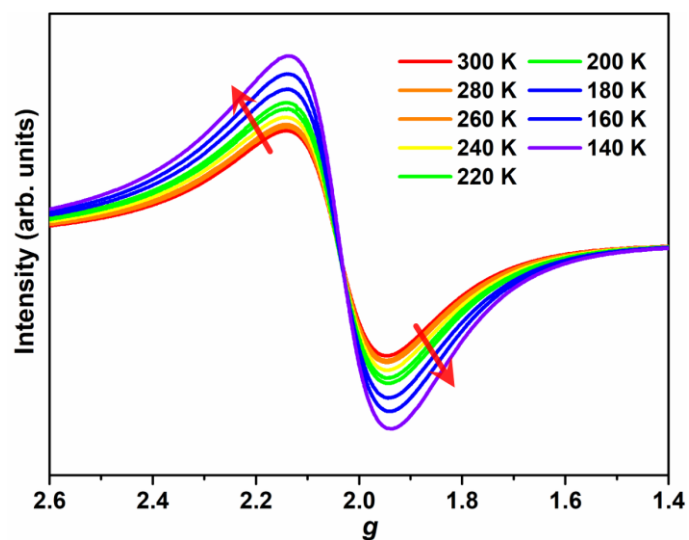

**Supplementary Figure 32.** ESR spectra of **1** under variable temperatures in the solid state under a frequency of 9.41 GHz.

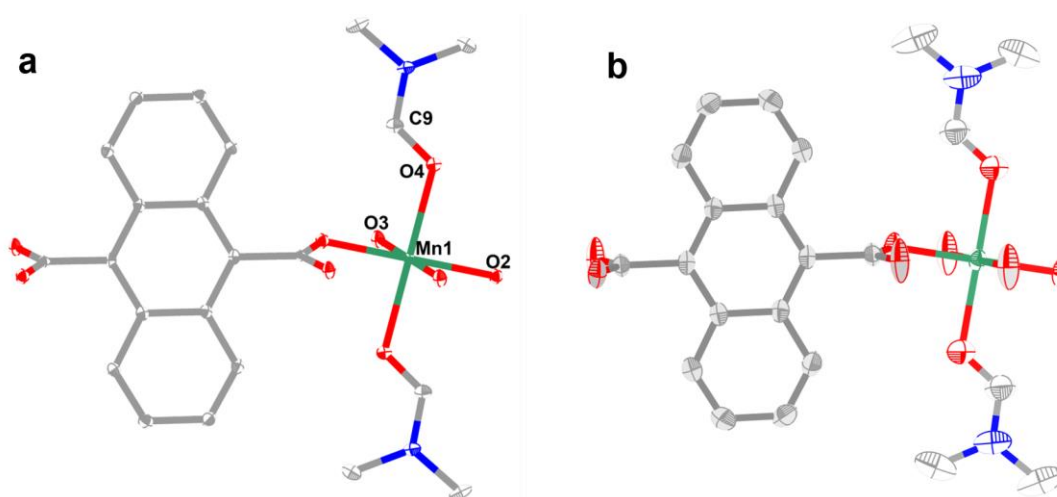

**Supplementary Figure 33.** Molecular view of **1a** at 50 K (**a**) and 300 K (**b**) with thermal ellipsoids set at 50% probability.



## Supplementary Tables

**Supplementary Table 1.** Crystallographic data for compounds **1**, **1a** and **2**.

|                                                                                                                                                                                                                                                                                                                                               | <b>1</b>                                                        | <b>1a (300 K)</b>                                               | <b>1a (93 K)</b>                                                | <b>1a (50 K)</b>                                                | <b>2 (293 K)</b>                                                |
|-----------------------------------------------------------------------------------------------------------------------------------------------------------------------------------------------------------------------------------------------------------------------------------------------------------------------------------------------|-----------------------------------------------------------------|-----------------------------------------------------------------|-----------------------------------------------------------------|-----------------------------------------------------------------|-----------------------------------------------------------------|
| Formula                                                                                                                                                                                                                                                                                                                                       | C <sub>22</sub> H <sub>26</sub> N <sub>2</sub> MnO <sub>8</sub> | C <sub>22</sub> H <sub>26</sub> N <sub>2</sub> MnO <sub>8</sub> | C <sub>22</sub> H <sub>26</sub> N <sub>2</sub> MnO <sub>8</sub> | C <sub>22</sub> H <sub>26</sub> N <sub>2</sub> MnO <sub>8</sub> | C <sub>22</sub> H <sub>26</sub> N <sub>2</sub> ZnO <sub>8</sub> |
| <i>Mr</i> (g·mol <sup>-1</sup> )                                                                                                                                                                                                                                                                                                              | 501.39                                                          | 501.39                                                          | 501.39                                                          | 501.39                                                          | 511.82                                                          |
| Space group                                                                                                                                                                                                                                                                                                                                   | <i>P</i> 2 <sub>1</sub> / <i>c</i>                              | <i>P</i> 2 <sub>1</sub> / <i>c</i>                              | <i>P</i> 2 <sub>1</sub> / <i>c</i>                              | <i>P</i> 2 <sub>1</sub> / <i>c</i>                              | <i>P</i> 2 <sub>1</sub> / <i>n</i>                              |
| Crystal system                                                                                                                                                                                                                                                                                                                                | Monoclinic                                                      | Monoclinic                                                      | Monoclinic                                                      | Monoclinic                                                      | Monoclinic                                                      |
| <i>a</i> (Å)                                                                                                                                                                                                                                                                                                                                  | 7.4467(5)                                                       | 7.4277(8)                                                       | 7.3345(3)                                                       | 7.3157(5)                                                       | 7.3224(6)                                                       |
| <i>b</i> (Å)                                                                                                                                                                                                                                                                                                                                  | 14.0847(8)                                                      | 14.0432(15)                                                     | 14.0017(6)                                                      | 13.9869(10)                                                     | 13.9149(10)                                                     |
| <i>c</i> (Å)                                                                                                                                                                                                                                                                                                                                  | 11.3810(6)                                                      | 11.3502(11)                                                     | 11.2243(5)                                                      | 11.2142(7)                                                      | 11.3052(9)                                                      |
| <i>α</i> (°)                                                                                                                                                                                                                                                                                                                                  | 90                                                              | 90                                                              | 90                                                              | 90                                                              | 90                                                              |
| <i>β</i> (°)                                                                                                                                                                                                                                                                                                                                  | 107.562(6)                                                      | 107.531(3)                                                      | 106.625(10)                                                     | 106.607(2)                                                      | 108.641(9)                                                      |
| <i>γ</i> (°)                                                                                                                                                                                                                                                                                                                                  | 90                                                              | 90                                                              | 90                                                              | 90                                                              | 90                                                              |
| <i>V</i> (Å <sup>3</sup> )                                                                                                                                                                                                                                                                                                                    | 1138.05(12)                                                     | 1128.9(2)                                                       | 1104.34(8)                                                      | 1099.62(13)                                                     | 1091.46(16)                                                     |
| <i>Z</i>                                                                                                                                                                                                                                                                                                                                      | 2                                                               | 2                                                               | 2                                                               | 2                                                               | 2                                                               |
| <i>F</i> (000)                                                                                                                                                                                                                                                                                                                                | 522                                                             | 522                                                             | 522                                                             | 522                                                             | 532                                                             |
| <i>D<sub>c</sub></i> (gcm <sup>-3</sup> )                                                                                                                                                                                                                                                                                                     | 1.463                                                           | 1.475                                                           | 1.508                                                           | 1.514                                                           | 1.557                                                           |
| <i>μ</i> (mm <sup>-1</sup> )                                                                                                                                                                                                                                                                                                                  | 0.631                                                           | 0.636                                                           | 0.650                                                           | 0.653                                                           | 1.178                                                           |
| <i>R</i> <sub>int</sub>                                                                                                                                                                                                                                                                                                                       | 0.0139                                                          | 0.0349                                                          | 0.0393                                                          | 0.0435                                                          | 0.0271                                                          |
|                                                                                                                                                                                                                                                                                                                                               | -8 ≤ <i>h</i> ≤ 8                                               | -9 ≤ <i>h</i> ≤ 9                                               | -8 ≤ <i>h</i> ≤ 8                                               | -8 ≤ <i>h</i> ≤ 8                                               | -11 ≤ <i>h</i> ≤ 9                                              |
| limiting indices                                                                                                                                                                                                                                                                                                                              | -16 ≤ <i>k</i> ≤ 14                                             | -17 ≤ <i>k</i> ≤ 12                                             | -16 ≤ <i>k</i> ≤ 13                                             | -16 ≤ <i>k</i> ≤ 16                                             | -20 ≤ <i>k</i> ≤ 17                                             |
|                                                                                                                                                                                                                                                                                                                                               | -13 ≤ <i>l</i> ≤ 13                                             | -13 ≤ <i>l</i> ≤ 13                                             | -13 ≤ <i>l</i> ≤ 12                                             | -12 ≤ <i>l</i> ≤ 13                                             | -14 ≤ <i>l</i> ≤ 17                                             |
| Collected reflections                                                                                                                                                                                                                                                                                                                         | 5074                                                            | 12928                                                           | 11650                                                           | 12065                                                           | 8286                                                            |
| Unique reflections                                                                                                                                                                                                                                                                                                                            | 2008                                                            | 2111                                                            | 1921                                                            | 1931                                                            | 3687                                                            |
| GOF on <i>F</i> <sup>2</sup>                                                                                                                                                                                                                                                                                                                  | 1.088                                                           | 1.115                                                           | 1.158                                                           | 1.142                                                           | 1.003                                                           |
| <i>R</i> <sub>1</sub> , <i>wR</i> <sub>2</sub> [ <i>I</i> > 2σ( <i>I</i> )]                                                                                                                                                                                                                                                                   | 0.0430 0.1131                                                   | 0.0479 0.1367                                                   | 0.0405 0.1216                                                   | 0.0273 0.0685                                                   | 0.0420 0.1024                                                   |
| <i>R</i> <sub>1</sub> , <i>wR</i> <sub>2</sub> [all data]                                                                                                                                                                                                                                                                                     | 0.0500 0.1197                                                   | 0.0491 0.1373                                                   | 0.0410 0.1218                                                   | 0.0311 0.0700                                                   | 0.0699 0.1203                                                   |
| <sup>a</sup> <i>R</i> <sub>1</sub> = ∑    <i>F</i> <sub>o</sub> -   <i>F</i> <sub>c</sub>    / ∑   <i>F</i> <sub>o</sub>  . <sup>b</sup> <i>wR</i> <sub>2</sub> = {∑ [w( <i>F</i> <sub>o</sub> <sup>2</sup> - <i>F</i> <sub>c</sub> <sup>2</sup> ) <sup>2</sup> ] / ∑ w( <i>F</i> <sub>o</sub> <sup>2</sup> ) <sup>2</sup> } <sup>1/2</sup> . |                                                                 |                                                                 |                                                                 |                                                                 |                                                                 |

**Supplementary Table 2.** Crystallographic data for compounds **3** and **4** at 293 K.

|                                                                             | <b>3</b>                                                        |        | <b>4</b>                                                        |        |
|-----------------------------------------------------------------------------|-----------------------------------------------------------------|--------|-----------------------------------------------------------------|--------|
| Formula                                                                     | C <sub>22</sub> H <sub>26</sub> N <sub>2</sub> NiO <sub>8</sub> |        | C <sub>22</sub> H <sub>26</sub> N <sub>2</sub> CoO <sub>8</sub> |        |
| <i>Mr</i> (g·mol <sup>-1</sup> )                                            | 505.16                                                          |        | 505.38                                                          |        |
| Space group                                                                 | <i>P</i> 2 <sub>1</sub> / <i>n</i>                              |        | <i>P</i> 2 <sub>1</sub> / <i>c</i>                              |        |
| Crystal system                                                              | Monoclinic                                                      |        | Monoclinic                                                      |        |
| <i>a</i> (Å)                                                                | 7.2927(10)                                                      |        | 7.3114(5)                                                       |        |
| <i>b</i> (Å)                                                                | 13.8403(15)                                                     |        | 13.8990(10)                                                     |        |
| <i>c</i> (Å)                                                                | 11.2599(15)                                                     |        | 11.3171(9)                                                      |        |
| $\alpha$ (°)                                                                | 90                                                              |        | 90                                                              |        |
| $\beta$ (°)                                                                 | 108.183(15)                                                     |        | 108.717(9)                                                      |        |
| $\gamma$ (°)                                                                | 90                                                              |        | 90                                                              |        |
| <i>V</i> (Å <sup>3</sup> )                                                  | 1079.7(3)                                                       |        | 1089.24(15)                                                     |        |
| <i>Z</i>                                                                    | 2                                                               |        | 2                                                               |        |
| <i>F</i> (000)                                                              | 528                                                             |        | 526                                                             |        |
| <i>D<sub>c</sub></i> (gcm <sup>-3</sup> )                                   | 1.554                                                           |        | 1.541                                                           |        |
| $\mu$ (mm <sup>-1</sup> )                                                   | 0.952                                                           |        | 0.841                                                           |        |
| <i>R</i> <sub>int</sub>                                                     | 0.0589                                                          |        | 0.0180                                                          |        |
|                                                                             | -10 ≤ <i>h</i> ≤ 10                                             |        | -8 ≤ <i>h</i> ≤ 8                                               |        |
| limiting indices                                                            | -20 ≤ <i>k</i> ≤ 17                                             |        | -16 ≤ <i>k</i> ≤ 16                                             |        |
|                                                                             | -13 ≤ <i>l</i> ≤ 16                                             |        | -13 ≤ <i>l</i> ≤ 13                                             |        |
| Collected reflections                                                       | 7596                                                            |        | 5809                                                            |        |
| Unique reflections                                                          | 3569                                                            |        | 1963                                                            |        |
| GOF on <i>F</i> <sup>2</sup>                                                | 1.002                                                           |        | 1.075                                                           |        |
| <i>R</i> <sub>1</sub> , <i>wR</i> <sub>2</sub> [ <i>I</i> > 2σ( <i>I</i> )] | 0.0574                                                          | 0.1419 | 0.0299                                                          | 0.0744 |
| <i>R</i> <sub>1</sub> , <i>wR</i> <sub>2</sub> [all data]                   | 0.0897                                                          | 0.1656 | 0.0375                                                          | 0.0799 |

<sup>a</sup>*R*<sub>1</sub> =  $\sum ||F_o| - |F_c|| / \sum |F_o|$ . <sup>b</sup>*wR*<sub>2</sub> =  $\{\sum [w(F_o^2 - F_c^2)^2] / \sum w(F_o^2)^2\}^{1/2}$ .

**Supplementary Table 3.** Selected bond lengths (Å) and angles (°) for compound **1** at 293 K.

| Compound <b>1</b>   |            |                  |            |
|---------------------|------------|------------------|------------|
| Mn(1)-O(2)          | 2.1566(14) | C(3)-C(8)        | 1.516(3)   |
| Mn(1)-O(2)#1        | 2.1566(14) | C(4)-C(5)        | 1.429(3)   |
| Mn(1)-O(3)          | 2.1723(19) | C(5)-C(6)        | 1.358(3)   |
| Mn(1)-O(3)#1        | 2.1723(19) | C(6)-C(7)        | 1.428(4)   |
| Mn(1)-O(4)          | 2.2162(18) | C(8)-O(1)        | 1.236(3)   |
| Mn(1)-O(4)#1        | 2.2162(18) | C(8)-O(2)        | 1.257(3)   |
| C(1)-C(7)           | 1.358(3)   | C(9)-O(4)        | 1.247(3)   |
| C(1)-C(2)           | 1.430(3)   | C(9)-N(1)        | 1.304(3)   |
| C(2)-C(3)           | 1.407(3)   | C(10)-N(1)       | 1.466(4)   |
| C(2)-C(4)           | 1.446(3)   | C(11)-N(1)       | 1.464(4)   |
| C(3)-C(4)#2         | 1.404(2)   |                  |            |
| O(2)-Mn(1)-O(2)#1   | 180        | C(4)#2-C(3)-C(2) | 121.51(19) |
| O(2)-Mn(1)-O(3)     | 91.25(7)   | C(4)#2-C(3)-C(8) | 118.78(16) |
| O(2)#1-Mn(1)-O(3)   | 88.75(7)   | C(2)-C(3)-C(8)   | 119.71(16) |
| O(2)-Mn(1)-O(3)#1   | 88.75(7)   | C(3)#2-C(4)-C(5) | 122.64(17) |
| O(2)#1-Mn(1)-O(3)#1 | 91.25(7)   | C(3)#2-C(4)-C(2) | 119.15(16) |
| O(3)-Mn(1)-O(3)#1   | 180        | C(5)-C(4)-C(2)   | 118.20(16) |
| O(2)-Mn(1)-O(4)     | 91.66(6)   | C(6)-C(5)-C(4)   | 121.53(19) |
| O(2)#1-Mn(1)-O(4)   | 88.34(6)   | C(5)-C(6)-C(7)   | 120.37(19) |
| O(3)-Mn(1)-O(4)     | 88.48(7)   | C(1)-C(7)-C(6)   | 120.12(19) |
| O(3)#1-Mn(1)-O(4)   | 91.52(7)   | O(1)-C(8)-O(2)   | 125.7(2)   |
| O(2)-Mn(1)-O(4)#1   | 88.34(6)   | O(1)-C(8)-C(3)   | 117.92(19) |
| O(2)#1-Mn(1)-O(4)#1 | 91.66(6)   | O(2)-C(8)-C(3)   | 116.36(17) |
| O(3)-Mn(1)-O(4)#1   | 91.52(7)   | O(4)-C(9)-N(1)   | 125.1(3)   |
| O(3)#1-Mn(1)-O(4)#1 | 88.48(7)   | C(9)-N(1)-C(11)  | 120.7(3)   |
| O(4)-Mn(1)-O(4)#1   | 180        | C(9)-N(1)-C(10)  | 120.7(3)   |
| C(7)-C(1)-C(2)      | 121.61(19) | C(11)-N(1)-C(10) | 118.6(3)   |
| C(3)-C(2)-C(1)      | 122.50(17) | C(8)-O(2)-Mn(1)  | 130.68(13) |
| C(3)-C(2)-C(4)      | 119.34(16) | C(9)-O(4)-Mn(1)  | 122.99(19) |
| C(1)-C(2)-C(4)      | 118.16(16) |                  |            |

Symmetry codes: #1 -x,-y,-z #2 -x+1,-y,-z+1.

**Supplementary Table 4.** Selected bond lengths (Å) and angles (°) for compound **1a** at 300 K.

| Compound <b>1a</b> (300 K) |            |                  |            |
|----------------------------|------------|------------------|------------|
| Mn(1)-O(2)#1               | 2.1492(16) | C(3)-C(8)        | 1.514(3)   |
| Mn(1)-O(2)                 | 2.1492(16) | C(4)-C(5)        | 1.429(3)   |
| Mn(1)-O(3)#1               | 2.166(2)   | C(5)-C(6)        | 1.354(4)   |
| Mn(1)-O(3)                 | 2.166(2)   | C(6)-C(7)        | 1.429(4)   |
| Mn(1)-O(4)                 | 2.208(2)   | C(8)-O(1)        | 1.241(3)   |
| Mn(1)-O(4)#1               | 2.208(2)   | C(8)-O(2)        | 1.246(3)   |
| C(1)-C(7)                  | 1.356(4)   | C(9)-O(4)        | 1.257(4)   |
| C(1)-C(2)                  | 1.427(3)   | C(9)-N(1)        | 1.301(4)   |
| C(2)-C(3)                  | 1.403(3)   | C(10)-N(1)       | 1.458(5)   |
| C(2)-C(4)                  | 1.436(3)   | C(11)-N(1)       | 1.458(5)   |
| C(3)-C(4)#2                | 1.403(3)   |                  |            |
| O(2)#1-Mn(1)-O(2)          | 180        | C(4)#2-C(3)-C(2) | 121.4(2)   |
| O(2)#1-Mn(1)-O(3)#1        | 91.27(8)   | C(4)#2-C(3)-C(8) | 118.77(19) |
| O(2)-Mn(1)-O(3)#1          | 88.73(8)   | C(2)-C(3)-C(8)   | 119.83(19) |
| O(2)#1-Mn(1)-O(3)          | 88.73(8)   | C(3)#2-C(4)-C(5) | 122.5(2)   |
| O(2)-Mn(1)-O(3)            | 91.27(8)   | C(3)#2-C(4)-C(2) | 119.24(19) |
| O(3)#1-Mn(1)-O(3)          | 180        | C(5)-C(4)-C(2)   | 118.24(19) |
| O(2)#1-Mn(1)-O(4)          | 88.35(8)   | C(6)-C(5)-C(4)   | 121.5(2)   |
| O(2)-Mn(1)-O(4)            | 91.65(8)   | C(5)-C(6)-C(7)   | 120.4(2)   |
| O(3)#1-Mn(1)-O(4)          | 91.72(9)   | C(1)-C(7)-C(6)   | 119.8(2)   |
| O(3)-Mn(1)-O(4)            | 88.27(9)   | O(1)-C(8)-O(2)   | 125.7(2)   |
| O(2)#1-Mn(1)-O(4)#1        | 91.65(8)   | O(1)-C(8)-C(3)   | 117.3(2)   |
| O(2)-Mn(1)-O(4)#1          | 88.35(8)   | O(2)-C(8)-C(3)   | 117.0(2)   |
| O(3)#1-Mn(1)-O(4)#1        | 88.27(9)   | O(4)-C(9)-N(1)   | 124.8(3)   |
| O(3)-Mn(1)-O(4)#1          | 91.73(9)   | C(9)-N(1)-C(11)  | 120.2(3)   |
| O(4)-Mn(1)-O(4)#1          | 180        | C(9)-N(1)-C(10)  | 121.3(3)   |
| C(7)-C(1)-C(2)             | 121.8(2)   | C(11)-N(1)-C(10) | 118.5(3)   |
| C(3)-C(2)-C(1)             | 122.4(2)   | C(8)-O(2)-Mn(1)  | 131.00(16) |
| C(3)-C(2)-C(4)             | 119.35(19) | C(9)-O(4)-Mn(1)  | 122.4(2)   |
| C(1)-C(2)-C(4)             | 118.24(19) |                  |            |

Symmetry codes: #1 -x,-y,-z #2 -x+1,-y,-z+1.

**Supplementary Table 5.** Selected bond lengths (Å) and angles (°) for compound **1a** at 93 K.

| Compound <b>1a</b> (93K) |            |                  |            |
|--------------------------|------------|------------------|------------|
| Mn(1)-O(2)#1             | 2.1505(17) | C(3)-C(8)        | 1.512(3)   |
| Mn(1)-O(2)               | 2.1505(17) | C(4)-C(5)        | 1.434(3)   |
| Mn(1)-O(3)#1             | 2.1717(17) | C(5)-C(6)        | 1.356(4)   |
| Mn(1)-O(3)               | 2.1717(17) | C(6)-C(7)        | 1.434(4)   |
| Mn(1)-O(4)#1             | 2.2067(18) | C(8)-O(1)        | 1.255(3)   |
| Mn(1)-O(4)               | 2.2067(18) | C(8)-O(2)        | 1.261(3)   |
| C(1)-C(7)                | 1.356(4)   | C(9)-O(4)        | 1.251(3)   |
| C(1)-C(2)                | 1.431(3)   | C(9)-N(1)        | 1.318(4)   |
| C(2)-C(3)                | 1.400(3)   | C(10)-N(1)       | 1.457(4)   |
| C(2)-C(4)                | 1.443(4)   | C(11)-N(1)       | 1.455(4)   |
| C(3)-C(4)#2              | 1.399(3)   |                  |            |
| O(2)#1-Mn(1)-O(2)        | 180        | C(4)#2-C(3)-C(2) | 121.9(2)   |
| O(2)#1-Mn(1)-O(3)#1      | 89.82(7)   | C(4)#2-C(3)-C(8) | 118.5(2)   |
| O(2)-Mn(1)-O(3)#1        | 90.18(7)   | C(2)-C(3)-C(8)   | 119.6(2)   |
| O(2)#1-Mn(1)-O(3)        | 90.18(7)   | C(3)#2-C(4)-C(5) | 122.7(2)   |
| O(2)-Mn(1)-O(3)          | 89.82(7)   | C(3)#2-C(4)-C(2) | 119.1(2)   |
| O(3)#1-Mn(1)-O(3)        | 180        | C(5)-C(4)-C(2)   | 118.2(2)   |
| O(2)#1-Mn(1)-O(4)#1      | 92.24(7)   | C(6)-C(5)-C(4)   | 121.5(2)   |
| O(2)-Mn(1)-O(4)#1        | 87.76(7)   | C(5)-C(6)-C(7)   | 120.3(2)   |
| O(3)#1-Mn(1)-O(4)#1      | 85.59(7)   | C(1)-C(7)-C(6)   | 120.1(2)   |
| O(3)-Mn(1)-O(4)#1        | 94.41(7)   | O(1)-C(8)-O(2)   | 125.6(2)   |
| O(2)#1-Mn(1)-O(4)        | 87.76(7)   | O(1)-C(8)-C(3)   | 117.3(2)   |
| O(2)-Mn(1)-O(4)          | 92.24(7)   | O(2)-C(8)-C(3)   | 117.1(2)   |
| O(3)#1-Mn(1)-O(4)        | 94.41(7)   | O(4)-C(9)-N(1)   | 124.9(3)   |
| O(3)-Mn(1)-O(4)          | 85.59(7)   | C(9)-N(1)-C(11)  | 121.4(2)   |
| O(4)#1-Mn(1)-O(4)        | 180        | C(9)-N(1)-C(10)  | 121.1(3)   |
| C(7)-C(1)-C(2)           | 121.7(2)   | C(11)-N(1)-C(10) | 117.5(3)   |
| C(3)-C(2)-C(1)           | 122.7(2)   | C(8)-O(2)-Mn(1)  | 129.01(16) |
| C(3)-C(2)-C(4)           | 119.0(2)   | C(9)-O(4)-Mn(1)  | 120.68(17) |
| C(1)-C(2)-C(4)           | 118.2(2)   |                  |            |

Symmetry codes: #1 -x,-y,-z #2 -x+1,-y,-z+1.

**Supplementary Table 6.** Selected bond lengths (Å) and angles (°) for compound **1a** at 50 K.

| Compound <b>1a</b> (50K) |            |                  |            |
|--------------------------|------------|------------------|------------|
| Mn(1)-O(2)#1             | 2.1522(11) | C(3)-C(8)        | 1.512(2)   |
| Mn(1)-O(2)               | 2.1522(11) | C(4)-C(5)        | 1.434(2)   |
| Mn(1)-O(3)               | 2.1722(12) | C(5)-C(6)        | 1.357(2)   |
| Mn(1)-O(3)#1             | 2.1722(12) | C(6)-C(7)        | 1.427(2)   |
| Mn(1)-O(4)#1             | 2.2077(12) | C(8)-O(1)        | 1.254(2)   |
| Mn(1)-O(4)               | 2.2077(12) | C(8)-O(2)        | 1.262(2)   |
| C(1)-C(7)                | 1.362(2)   | C(9)-O(4)        | 1.249(2)   |
| C(1)-C(2)                | 1.433(2)   | C(9)-N(1)        | 1.320(2)   |
| C(2)-C(3)                | 1.402(2)   | C(10)-N(1)       | 1.461(2)   |
| C(2)-C(4)                | 1.435(2)   | C(11)-N(1)       | 1.460(2)   |
| C(3)-C(4)#2              | 1.405(2)   |                  |            |
| O(2)#1-Mn(1)-O(2)        | 180        | C(2)-C(3)-C(4)#2 | 121.35(16) |
| O(2)#1-Mn(1)-O(3)        | 90.40(5)   | C(2)-C(3)-C(8)   | 119.99(15) |
| O(2)-Mn(1)-O(3)          | 89.60(5)   | C(4)#2-C(3)-C(8) | 118.67(15) |
| O(2)#1-Mn(1)-O(3)#1      | 89.60(5)   | C(3)#2-C(4)-C(5) | 122.25(15) |
| O(2)-Mn(1)-O(3)#1        | 90.40(5)   | C(3)#2-C(4)-C(2) | 119.20(15) |
| O(3)-Mn(1)-O(3)#1        | 180        | C(5)-C(4)-C(2)   | 118.53(15) |
| O(2)#1-Mn(1)-O(4)#1      | 92.33(4)   | C(6)-C(5)-C(4)   | 121.08(16) |
| O(2)-Mn(1)-O(4)#1        | 87.67(4)   | C(5)-C(6)-C(7)   | 120.60(16) |
| O(3)-Mn(1)-O(4)#1        | 94.62(5)   | C(1)-C(7)-C(6)   | 120.14(16) |
| O(3)#1-Mn(1)-O(4)#1      | 85.38(5)   | O(1)-C(8)-O(2)   | 125.95(16) |
| O(2)#1-Mn(1)-O(4)        | 87.67(4)   | O(1)-C(8)-C(3)   | 117.46(15) |
| O(2)-Mn(1)-O(4)          | 92.33(4)   | O(2)-C(8)-C(3)   | 116.58(15) |
| O(3)-Mn(1)-O(4)          | 85.38(5)   | O(4)-C(9)-N(1)   | 124.85(17) |
| O(3)#1-Mn(1)-O(4)        | 94.62(5)   | C(9)-N(1)-C(11)  | 121.59(15) |
| O(4)#1-Mn(1)-O(4)        | 180        | C(9)-N(1)-C(10)  | 120.89(15) |
| C(7)-C(1)-C(2)           | 121.23(16) | C(11)-N(1)-C(10) | 117.51(15) |
| C(3)-C(2)-C(1)           | 122.11(16) | C(8)-O(2)-Mn(1)  | 128.39(11) |
| C(3)-C(2)-C(4)           | 119.45(15) | C(9)-O(4)-Mn(1)  | 120.45(11) |
| C(1)-C(2)-C(4)           | 118.43(15) |                  |            |

Symmetry codes: #1 -x,-y,-z #2 -x+1,-y,-z+1.

**Supplementary Table 7.** Selected bond lengths (Å) and angles (°) for compound **2** at 293 K.

| Compound <b>2</b>   |             |                  |            |
|---------------------|-------------|------------------|------------|
| Zn(1)-O(2)#1        | 2.0572(13)  | C(3)-C(8)        | 1.505(2)   |
| Zn(1)-O(2)          | 2.0572(13)  | C(4)-C(5)        | 1.429(2)   |
| Zn(1)-O(3)#1        | 2.0876(16)  | C(5)-C(6)        | 1.353(3)   |
| Zn(1)-O(3)          | 2.0877(16)  | C(6)-C(7)        | 1.412(3)   |
| Zn(1)-O(4)#1        | 2.1381(16)  | C(8)-O(1)        | 1.239(2)   |
| Zn(1)-O(4)          | 2.1382(16)  | C(8)-O(2)        | 1.253(2)   |
| C(1)-C(7)#2         | 1.350(3)    | C(9)-O(4)        | 1.236(3)   |
| C(1)-C(2)           | 1.428(2)    | C(9)-N(1)        | 1.294(3)   |
| C(2)-C(3)           | 1.395(2)    | C(10)-N(1)       | 1.457(3)   |
| C(2)-C(4)#2         | 1.432(2)    | C(11)-N(1)       | 1.454(3)   |
| C(3)-C(4)           | 1.399(2)    |                  |            |
| O(2)#1-Zn(1)-O(2)   | 180.000(10) | C(2)-C(3)-C(4)   | 121.14(15) |
| O(2)#1-Zn(1)-O(3)#1 | 88.90(6)    | C(2)-C(3)-C(8)   | 119.81(13) |
| O(2)-Zn(1)-O(3)#1   | 91.10(6)    | C(4)-C(3)-C(8)   | 119.05(13) |
| O(2)#1-Zn(1)-O(3)   | 91.10(6)    | C(3)-C(4)-C(5)   | 122.08(14) |
| O(2)-Zn(1)-O(3)     | 88.90(6)    | C(3)-C(4)-C(2)#2 | 119.32(13) |
| O(3)#1-Zn(1)-O(3)   | 180         | C(5)-C(4)-C(2)#2 | 118.60(13) |
| O(2)#1-Zn(1)-O(4)#1 | 93.02(6)    | C(6)-C(5)-C(4)   | 120.91(16) |
| O(2)-Zn(1)-O(4)#1   | 86.98(6)    | C(5)-C(6)-C(7)   | 120.72(16) |
| O(3)#1-Zn(1)-O(4)#1 | 87.93(7)    | C(1)#2-C(7)-C(6) | 120.24(16) |
| O(3)-Zn(1)-O(4)#1   | 92.07(7)    | O(1)-C(8)-O(2)   | 126.23(17) |
| O(2)#1-Zn(1)-O(4)   | 86.98(6)    | O(1)-C(8)-C(3)   | 118.09(17) |
| O(2)-Zn(1)-O(4)     | 93.02(6)    | O(2)-C(8)-C(3)   | 115.67(16) |
| O(3)#1-Zn(1)-O(4)   | 92.07(7)    | O(4)-C(9)-N(1)   | 125.7(3)   |
| O(3)-Zn(1)-O(4)     | 87.93(7)    | C(9)-N(1)-C(11)  | 121.2(2)   |
| O(4)#1-Zn(1)-O(4)   | 180         | C(9)-N(1)-C(10)  | 120.9(2)   |
| C(7)#2-C(1)-C(2)    | 121.66(16)  | C(11)-N(1)-C(10) | 117.8(3)   |
| C(3)-C(2)-C(1)      | 122.60(14)  | C(8)-O(2)-Zn(1)  | 130.05(12) |
| C(3)-C(2)-C(4)#2    | 119.54(13)  | C(9)-O(4)-Zn(1)  | 121.56(17) |
| C(1)-C(2)-C(4)#2    | 117.86(14)  |                  |            |

Symmetry codes: #1 -x+1,-y,-z+1 #2 -x+1,-y,-z+2.

**Supplementary Table 8.** Selected bond lengths (Å) and angles (°) for compound **3** at 293 K.

| Compound <b>3</b>   |            |                  |            |
|---------------------|------------|------------------|------------|
| Ni(1)-O(2)#1        | 2.0366(17) | C(3)-C(8)        | 1.504(3)   |
| Ni(1)-O(2)          | 2.0366(17) | C(4)-C(5)        | 1.425(3)   |
| Ni(1)-O(3)#1        | 2.055(2)   | C(5)-C(6)        | 1.355(3)   |
| Ni(1)-O(3)          | 2.055(2)   | C(6)-C(7)        | 1.410(4)   |
| Ni(1)-O(4)#1        | 2.0815(19) | C(8)-O(1)        | 1.240(3)   |
| Ni(1)-O(4)          | 2.0816(19) | C(8)-O(2)        | 1.259(3)   |
| C(1)-C(7)           | 1.356(3)   | C(9)-O(4)        | 1.237(3)   |
| C(1)-C(2)           | 1.428(3)   | C(9)-N(1)        | 1.301(4)   |
| C(2)-C(3)           | 1.398(3)   | C(10)-N(1)       | 1.450(4)   |
| C(2)-C(4)           | 1.429(3)   | C(11)-N(1)       | 1.464(4)   |
| C(3)-C(4)#2         | 1.401(3)   |                  |            |
| O(2)#1-Ni(1)-O(2)   | 180        | C(2)-C(3)-C(4)#2 | 121.1(2)   |
| O(2)#1-Ni(1)-O(3)#1 | 91.71(8)   | C(2)-C(3)-C(8)   | 120.16(17) |
| O(2)-Ni(1)-O(3)#1   | 88.28(8)   | C(4)#2-C(3)-C(8) | 118.71(17) |
| O(2)#1-Ni(1)-O(3)   | 88.29(8)   | C(3)#2-C(4)-C(5) | 122.19(19) |
| O(2)-Ni(1)-O(3)     | 91.71(8)   | C(3)#2-C(4)-C(2) | 119.13(17) |
| O(3)#1-Ni(1)-O(3)   | 180        | C(5)-C(4)-C(2)   | 118.67(18) |
| O(2)#1-Ni(1)-O(4)#1 | 93.30(7)   | C(6)-C(5)-C(4)   | 121.1(2)   |
| O(2)-Ni(1)-O(4)#1   | 86.70(7)   | C(5)-C(6)-C(7)   | 120.5(2)   |
| O(3)#1-Ni(1)-O(4)#1 | 92.30(8)   | C(1)-C(7)-C(6)   | 120.4(2)   |
| O(3)-Ni(1)-O(4)#1   | 87.70(8)   | O(1)-C(8)-O(2)   | 126.5(2)   |
| O(2)#1-Ni(1)-O(4)   | 86.70(7)   | O(1)-C(8)-C(3)   | 118.0(2)   |
| O(2)-Ni(1)-O(4)     | 93.30(7)   | O(2)-C(8)-C(3)   | 115.5(2)   |
| O(3)#1-Ni(1)-O(4)   | 87.69(8)   | O(4)-C(9)-N(1)   | 125.3(3)   |
| O(3)-Ni(1)-O(4)     | 92.31(8)   | C(9)-N(1)-C(10)  | 121.3(3)   |
| O(4)#1-Ni(1)-O(4)   | 180        | C(9)-N(1)-C(11)  | 120.9(3)   |
| C(7)-C(1)-C(2)      | 121.4(2)   | C(10)-N(1)-C(11) | 117.8(3)   |
| C(3)-C(2)-C(4)      | 119.75(17) | C(8)-O(2)-Ni(1)  | 129.63(15) |
| C(3)-C(2)-C(1)      | 122.26(19) | C(9)-O(4)-Ni(1)  | 121.2(2)   |
| C(4)-C(2)-C(1)      | 117.99(18) |                  |            |

Symmetry codes: #1 -x+1,-y,-z+1 #2 -x+1,-y,-z.



**Supplementary Table 9.** Selected bond lengths (Å) and angles (°) for compound **4** at 293 K.

| Compound <b>4</b>   |            |                  |            |
|---------------------|------------|------------------|------------|
| Co(1)-O(2)#1        | 2.0725(14) | C(3)-C(8)        | 1.502(3)   |
| Co(1)-O(2)          | 2.0726(14) | C(4)-C(5)        | 1.426(3)   |
| Co(1)-O(3)#1        | 2.0773(15) | C(5)-C(6)        | 1.352(3)   |
| Co(1)-O(3)          | 2.0773(15) | C(6)-C(7)        | 1.412(3)   |
| Co(1)-O(4)          | 2.1199(15) | C(8)-O(1)        | 1.241(2)   |
| Co(1)-O(4)#1        | 2.1199(15) | C(8)-O(2)        | 1.251(2)   |
| C(1)-C(7)           | 1.351(3)   | C(9)-O(4)        | 1.239(3)   |
| C(1)-C(2)           | 1.423(3)   | C(9)-N(1)        | 1.306(3)   |
| C(2)-C(3)           | 1.400(2)   | C(10)-N(1)       | 1.453(3)   |
| C(2)-C(4)           | 1.428(3)   | C(11)-N(1)       | 1.458(3)   |
| C(3)-C(4)#2         | 1.399(2)   |                  |            |
| O(2)#1-Co(1)-O(2)   | 180.00(8)  | C(4)#2-C(3)-C(2) | 121.10(17) |
| O(2)#1-Co(1)-O(3)#1 | 90.59(6)   | C(4)#2-C(3)-C(8) | 118.99(15) |
| O(2)-Co(1)-O(3)#1   | 89.41(6)   | C(2)-C(3)-C(8)   | 119.90(15) |
| O(2)#1-Co(1)-O(3)   | 89.41(6)   | C(3)#2-C(4)-C(5) | 122.27(17) |
| O(2)-Co(1)-O(3)     | 90.59(6)   | C(3)#2-C(4)-C(2) | 119.33(15) |
| O(3)#1-Co(1)-O(3)   | 180        | C(5)-C(4)-C(2)   | 118.39(16) |
| O(2)#1-Co(1)-O(4)   | 93.08(6)   | C(6)-C(5)-C(4)   | 121.22(19) |
| O(2)-Co(1)-O(4)     | 86.92(6)   | C(5)-C(6)-C(7)   | 120.50(18) |
| O(3)#1-Co(1)-O(4)   | 92.54(7)   | C(1)-C(7)-C(6)   | 120.08(18) |
| O(3)-Co(1)-O(4)     | 87.46(7)   | O(1)-C(8)-O(2)   | 126.18(18) |
| O(2)#1-Co(1)-O(4)#1 | 86.92(6)   | O(1)-C(8)-C(3)   | 117.86(17) |
| O(2)-Co(1)-O(4)#1   | 93.08(6)   | O(2)-C(8)-C(3)   | 115.96(16) |
| O(3)#1-Co(1)-O(4)#1 | 87.46(7)   | O(4)-C(9)-N(1)   | 125.2(3)   |
| O(3)-Co(1)-O(4)#1   | 92.54(7)   | C(9)-N(1)-C(10)  | 121.0(2)   |
| O(4)-Co(1)-O(4)#1   | 180        | C(9)-N(1)-C(11)  | 120.7(3)   |
| C(7)-C(1)-C(2)      | 121.77(19) | C(10)-N(1)-C(11) | 118.3(2)   |
| C(3)-C(2)-C(1)      | 122.40(17) | C(8)-O(2)-Co(1)  | 130.02(12) |
| C(3)-C(2)-C(4)      | 119.56(15) | C(9)-O(4)-Co(1)  | 121.43(17) |
| C(1)-C(2)-C(4)      | 118.03(16) |                  |            |

Symmetry codes: #1 -x,-y+1,-z+1 #2 -x+1,-y+1,-z+2.

**Supplementary Table 10.** Continuous Shape Measure (CShM) analyses of geometries for compounds **1–4** by SHAPE 2.0 Software.

| Geometry                                   | <b>1</b> | <b>1a (300 K)</b> | <b>1a (93 K)</b> | <b>1a (50 K)</b> | <b>2</b> | <b>3</b> | <b>4</b> |
|--------------------------------------------|----------|-------------------|------------------|------------------|----------|----------|----------|
| Hexagon ( $D_{6h}$ )                       | 32.607   | 32.541            | 30.719           | 30.519           | 30.951   | 30.508   | 30.933   |
| Pentagonal pyramid ( $C_{5v}$ )            | 29.948   | 29.921            | 29.098           | 29.012           | 29.050   | 28.944   | 29.191   |
| Octahedron ( $O_h$ )                       | 0.047    | 0.050             | 0.136            | 0.149            | 0.101    | 0.107    | 0.095    |
| Trigonal prism ( $D_{3h}$ )                | 16.257   | 16.233            | 16.090           | 16.089           | 16.346   | 16.363   | 16.220   |
| Johnson pentagonal pyramid J2 ( $C_{5v}$ ) | 33.393   | 33.371            | 32.439           | 32.342           | 32.310   | 32.234   | 32.543   |

**Supplementary Table 11.** The H-bond lengths (Å) for **1** at 293 K.

| D–H $\cdots$ A           | $d$ (D–H) (Å) | $d$ (H $\cdots$ A) (Å) | $d$ (D $\cdots$ A) (Å) | $\angle$ (DHA) (deg) |
|--------------------------|---------------|------------------------|------------------------|----------------------|
| O(3)–H(3A) $\cdots$ O(1) | 0.85          | 1.85                   | 2.677(3)               | 164                  |
| O(3)–H(3B) $\cdots$ O(1) | 0.85          | 2.04                   | 2.754(3)               | 142                  |

**Supplementary Table 12.** The H-bond lengths (Å) for **1a** at 300 K.

| D–H $\cdots$ A           | $d$ (D–H) (Å) | $d$ (H $\cdots$ A) (Å) | $d$ (D $\cdots$ A) (Å) | $\angle$ (DHA) (deg) |
|--------------------------|---------------|------------------------|------------------------|----------------------|
| O(3)–H(3A) $\cdots$ O(1) | 0.85          | 1.92                   | 2.673(3)               | 146                  |
| O(3)–H(3B) $\cdots$ O(1) | 0.85          | 2.18                   | 2.748(3)               | 125                  |

**Supplementary Table 13.** The H-bond lengths (Å) for **1a** at 93 K.

| D–H $\cdots$ A           | $d$ (D–H) (Å) | $d$ (H $\cdots$ A) (Å) | $d$ (D $\cdots$ A) (Å) | $\angle$ (DHA) (deg) |
|--------------------------|---------------|------------------------|------------------------|----------------------|
| O(3)–H(3A) $\cdots$ O(1) | 0.85          | 1.84                   | 2.678(3)               | 166                  |
| O(3)–H(3B) $\cdots$ O(1) | 0.85          | 2.06                   | 2.745(3)               | 138                  |

**Supplementary Table 14.** The H-bond lengths (Å) for **1a** at 50 K.

| D–H $\cdots$ A           | $d$ (D–H) (Å) | $d$ (H $\cdots$ A) (Å) | $d$ (D $\cdots$ A) (Å) | $\angle$ (DHA) (deg) |
|--------------------------|---------------|------------------------|------------------------|----------------------|
| O(3)–H(3A) $\cdots$ O(1) | 0.85          | 1.83                   | 2.679(17)              | 169                  |
| O(3)–H(3B) $\cdots$ O(1) | 0.85          | 2.01                   | 2.745(18)              | 145                  |

**Supplementary Table 15.** The H-bond lengths (Å) for **2** at 293 K.

| D–H $\cdots$ A           | $d$ (D–H) (Å) | $d$ (H $\cdots$ A) (Å) | $d$ (D $\cdots$ A) (Å) | $\angle$ (DHA) (deg) |
|--------------------------|---------------|------------------------|------------------------|----------------------|
| O(3)–H(3A) $\cdots$ O(1) | 0.85          | 1.83                   | 2.644(2)               | 160                  |
| O(3)–H(3B) $\cdots$ O(1) | 0.85          | 2.21                   | 2.814(2)               | 128                  |

**Supplementary Table 16.** The complexes with the width of thermal hysteresis loops larger than 100 K.

| Molecular formula                                                                                                             | $T_{1/2\downarrow}$ | $T_{1/2\uparrow}$ | $\Delta T$ | reproducible | reference |
|-------------------------------------------------------------------------------------------------------------------------------|---------------------|-------------------|------------|--------------|-----------|
| Rb <sub>0.73</sub> Mn[Fe(CN) <sub>6</sub> ] <sub>0.91</sub> ·1.4H <sub>2</sub> O                                              | 147 K               | 262 K             | 116 K      | √            | 1         |
| [FeL <sub>2</sub> ](BF <sub>4</sub> ) <sub>2</sub>                                                                            | 350 K               | 495 K             | 145 K      | √            | 2         |
| Rb <sup>I</sup> <sub>0.64</sub> Mn <sup>II</sup> ·[Fe <sup>III</sup> (CN) <sub>6</sub> ] <sub>0.88</sub> ·1.7H <sub>2</sub> O | 165 K               | 303 K             | 138 K      | √            | 3         |
| [Fe(bpp) <sub>2</sub> ](CF <sub>3</sub> SO <sub>3</sub> ) <sub>2</sub> ·H <sub>2</sub> O                                      | 147 K               | 285 K             | 138 K      | √            | 4         |
| Rb <sub>0.94</sub> Mn[Fe(CN) <sub>6</sub> ] <sub>0.98</sub> ·2.5H <sub>2</sub> O                                              | 185 K               | 300 K             | 115 K      | √            | 5         |
| [FeL <sub>2</sub> ](BF <sub>4</sub> ) <sub>2</sub> ·xH <sub>2</sub> O                                                         | 360 K               | 490 K             | 130 K      | ×            | 6         |
| Co(py <sub>2</sub> O) <sub>2</sub> (3,6-DBQ) <sub>2</sub>                                                                     | 100 K               | 330 K             | 230 K      | ×            | 7         |
| [Fe(qsal) <sub>2</sub> ]NCSe·MeOH                                                                                             | 212 K               | 352 K             | 140 K      | ×            | 8         |
| [Fe(qsal) <sub>2</sub> ]NCSe·CH <sub>2</sub> Cl <sub>2</sub>                                                                  | 212 K               | 392 K             | 180 K      | ×            | 8         |
| [Fe(hyetrz) <sub>3</sub> ](anion) <sub>2</sub> ·3H <sub>2</sub> O                                                             | 100 K               | 370 K             | 270 K      | ×            | 9         |
| [Fe(qsal-I) <sub>2</sub> ]OTf·EtOH                                                                                            | 139 K               | 252 K             | 113 K      | ×            | 10        |
| [Co(C12-terpy) <sub>2</sub> ](BF <sub>4</sub> ) <sub>2</sub>                                                                  | 258 K               | ≥ 400 K           | ≥ 142 K    | ×            | 11        |
| [Fe(qsal) <sub>2</sub> ]NCSe·DMSO                                                                                             | 209 K               | 324 K             | 115 K      | ×            | 12        |
| [Fe(qnal-OMe) <sub>2</sub> ]BPh <sub>4</sub> ·2MeOH                                                                           | 194 K               | 304 K             | 110 K      | ×            | 13        |
| [Fe(1-BPP-COOC <sub>2</sub> H <sub>5</sub> ) <sub>2</sub> ](ClO <sub>4</sub> ) <sub>2</sub> ·CH <sub>3</sub> CN               | 183 K               | 284 K             | 101 K      | ×            | 14        |

## Supplementary References

- Ohkoshi, S. i., Matsuda, T., Tokoro, H. & Hashimoto, K. A Surprisingly Large Thermal Hysteresis Loop in a Reversible Phase Transition of Rb<sub>x</sub>Mn[Fe(CN)<sub>6</sub>]<sub>(x+2)/3</sub>·zH<sub>2</sub>O. *Chem. Mater.* **17**, 81–84 (2005).
- Bushuev, M. B. et al. A mononuclear iron(II) complex: cooperativity, kinetics and activation energy of the solvent-dependent spin transition. *Dalton Trans.* **45**, 107–120 (2016).
- Tokoro, H., Miyashita, S., Hashimoto, K. & Ohkoshi, S.-i. Huge thermal hysteresis loop and a hidden stable phase in a charge-transfer phase transition of Rb<sub>0.64</sub>Mn[Fe(CN)<sub>6</sub>]<sub>0.88</sub>·1.7H<sub>2</sub>O. *Phys. Rev. B* **73**, 172415 (2006).
- Buchen, T., Gütllich, P., Sugiyarto, K. H. & Goodwin, H. A. High-Spin→Low-Spin Relaxation in [Fe(bpp)<sub>2</sub>](CF<sub>3</sub>SO<sub>3</sub>)<sub>2</sub>·H<sub>2</sub>O after LIESST and Thermal Spin-State Trapping-Dynamics of Spin Transition Versus Dynamics of Phase Transition. *Chem. Eur. J.* **2**, 1134–1138 (1996).
- Azzolina, G. et al. Single laser shot photoinduced phase transition of rubidium manganese hexacyanoferrate investigated by X-ray diffraction. *Eur. J. Inorg. Chem.* **2019**, 3142–3147 (2019).
- Bushuev, M. B. et al. Unprecedented bistability domain and interplay between spin crossover

- and polymorphism in a mononuclear iron(II) complex. *Dalton Trans.* **43**, 3906–3910 (2014).
- 7 Jung, O. S., Jo, D. H., Lee, Y. A., Conklin, B. J. & Pierpont, C. G. Bistability and Molecular Switching for Semiquinone and Catechol Complexes of Cobalt. Studies on Redox Isomerism for the Bis(pyridine) Ether Series  $\text{Co}(\text{py}_2\text{X})(3,6\text{-DBQ})_2$ ,  $\text{X} = \text{O}, \text{S}, \text{Se}, \text{and Te}$ . *Inorg. Chem.* **36**, 19–24 (1997).
  - 8 Hayami, S., Gu, Z. Z., Yoshiki, H., Fujishima, A. & Sato, O. Iron(III) Spin-Crossover Compounds with a Wide Apparent Thermal Hysteresis around Room Temperature. *J. Am. Chem. Soc.* **123**, 11644–11650 (2001).
  - 9 Garcia, Y. et al. Non-classical  $\text{Fe}^{\text{II}}$  spin-crossover behaviour leading to an unprecedented extremely large apparent thermal hysteresis of 270 K: application for displays. *J. Mater. Chem.* **7**, 857–858 (1997).
  - 10 Phonsri, W. et al. Solvent modified spin crossover in an iron(III) complex: phase changes and an exceptionally wide hysteresis. *Chem. Sci.* **8**, 3949–3959 (2017).
  - 11 Han, Y. & Huynh, H. V. Pyrazolin-4-ylidenes: a new class of intriguing ligands. *Dalton Trans.* **40**, 2141–2147 (2011).
  - 12 Hayami, S. et al. Iron(III) spin transition compound with a large thermal hysteresis. *J. Radioanal. Nucl. Chem.* **255**, 443–447 (2003).
  - 13 Nakaya, M. et al. Spin-crossover and LIESST Effect for Iron(III) Complex Based on  $\pi$ - $\pi$  Stacking by Coordination Programming. *Chem. Lett.* **43**, 1058–1060 (2014).
  - 14 Senthil Kumar, K. et al. Bi-stable spin-crossover characteristics of a highly distorted  $[\text{Fe}(\text{1-BPP-COOC}_2\text{H}_5)_2](\text{ClO}_4)_2 \cdot \text{CH}_3\text{CN}$  complex. *Dalton Trans.* **48**, 3825–3830 (2019).
